# Supplementary material
Source: PubMed Central journal article supplement (PMC10506780)
Supplement: ciad290_supplementary_data.pdf [file ciad290_supplementary_data.pdf]

## Supplementary Appendix

### Supplementary Figure 1. Study periods

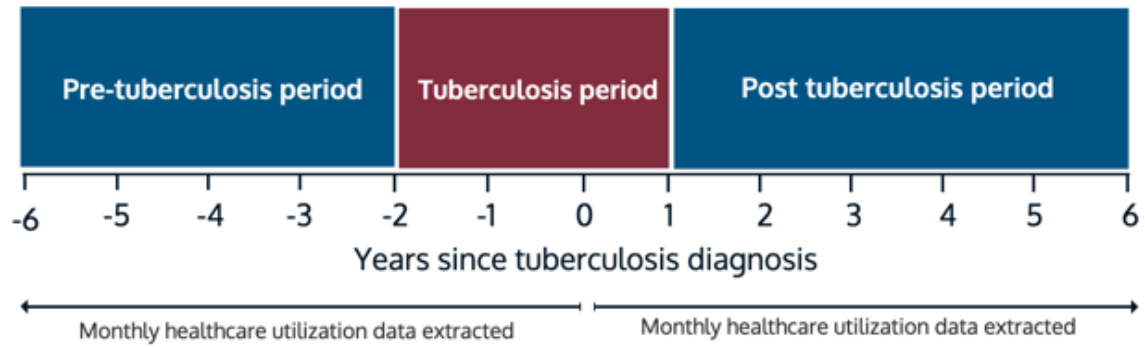

**Supplementary Table 1.** ICD-9 codes used to examine the impact treated tuberculosis had on different categories of out-patient physician encounters

| <b>Category</b>                                                       | <b>ICD9 code range</b> |
|-----------------------------------------------------------------------|------------------------|
| Diseases of the respiratory system                                    | 460 - 519              |
| Diseases of the circulatory system                                    | 390 - 459              |
| Mental disorders                                                      | 290 - 319              |
| Diseases of the genitourinary system                                  | 580 - 629              |
| Infectious and parasitic diseases                                     | 001-139                |
| Injury and poisoning                                                  | 800 - 999              |
| Endocrine, nutritional and metabolic diseases, and immunity disorders | 240 - 279              |
| Symptoms, signs, and ill-defined conditions                           | 780 - 799              |

**Supplementary Figure 2. Study flowchart**

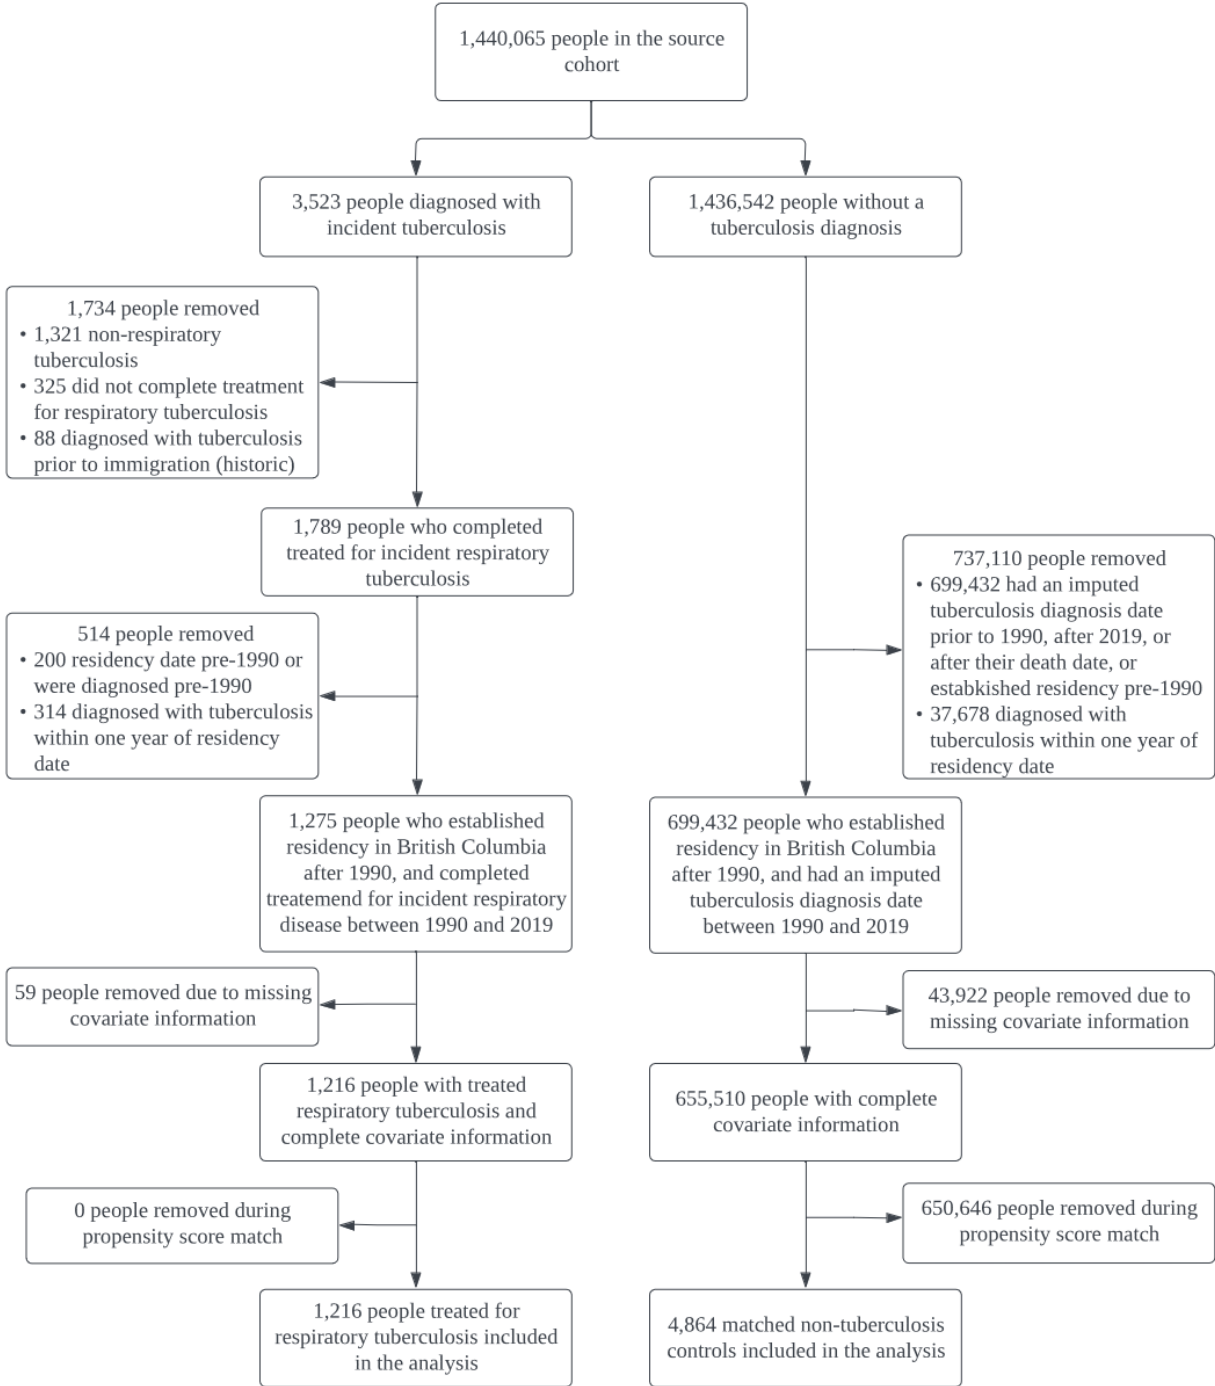

**Supplementary Table 2.** Population denominator summary for monthly intervals

| Years since tuberculosis diagnosis | Monthly interval | Control population | Tuberculosis population | Years since tuberculosis diagnosis | Monthly interval | Control population | Tuberculosis population |
|------------------------------------|------------------|--------------------|-------------------------|------------------------------------|------------------|--------------------|-------------------------|
| -5                                 | -72              | 2789               | 692                     | 5                                  | 72               | 2896               | 705                     |
|                                    | -71              | 2795               | 694                     |                                    | 71               | 2920               | 710                     |
|                                    | -70              | 2825               | 702                     |                                    | 70               | 2936               | 714                     |
|                                    | -69              | 2855               | 712                     |                                    | 69               | 2955               | 719                     |
|                                    | -68              | 2877               | 717                     |                                    | 68               | 2980               | 728                     |
|                                    | -67              | 2904               | 724                     |                                    | 67               | 2998               | 737                     |
|                                    | -66              | 2930               | 733                     |                                    | 66               | 3029               | 745                     |
|                                    | -65              | 2956               | 740                     |                                    | 65               | 3055               | 756                     |
|                                    | -64              | 2977               | 744                     |                                    | 64               | 3074               | 763                     |
|                                    | -63              | 3002               | 747                     |                                    | 63               | 3100               | 771                     |
|                                    | -62              | 3017               | 752                     |                                    | 62               | 3121               | 777                     |
|                                    | -61              | 3035               | 758                     |                                    | 61               | 3139               | 783                     |
|                                    | -4               | -60                | 3051                    |                                    | 766              | 4                  | 60                      |
| -59                                |                  | 3101               | 778                     | 59                                 | 3200             |                    | 801                     |
| -58                                |                  | 3108               | 781                     | 58                                 | 3220             |                    | 807                     |
| -57                                |                  | 3143               | 790                     | 57                                 | 3245             |                    | 813                     |
| -56                                |                  | 3163               | 795                     | 56                                 | 3271             |                    | 816                     |
| -55                                |                  | 3221               | 810                     | 55                                 | 3288             |                    | 820                     |
| -54                                |                  | 3239               | 814                     | 54                                 | 3320             |                    | 825                     |
| -53                                |                  | 3260               | 820                     | 53                                 | 3337             |                    | 827                     |
| -52                                |                  | 3269               | 824                     | 52                                 | 3362             |                    | 830                     |
| -51                                |                  | 3303               | 832                     | 51                                 | 3379             |                    | 833                     |
| -50                                |                  | 3348               | 844                     | 50                                 | 3395             |                    | 835                     |

|     |      |      |      |
|-----|------|------|------|
|     | -49  | 3371 | 849  |
| -3  | -48  | 3391 | 857  |
|     | -47  | 3437 | 868  |
|     | -46  | 3492 | 877  |
|     | -45  | 3533 | 885  |
|     | -44  | 3628 | 897  |
|     | -43  | 3663 | 909  |
|     | -42  | 3710 | 917  |
|     | -41  | 3741 | 928  |
|     | -40  | 3762 | 938  |
|     | -39  | 3810 | 941  |
|     | -38  | 3840 | 949  |
|     | -37  | 3854 | 958  |
|     | -2   | -36  | 3897 |
| -35 |      | 3921 | 978  |
| -34 |      | 3954 | 986  |
| -33 |      | 3976 | 992  |
| -32 |      | 3994 | 996  |
| -31 |      | 4015 | 1006 |
| -30 |      | 4029 | 1011 |
| -29 |      | 4047 | 1019 |
| -28 |      | 4094 | 1030 |
| -27 |      | 4145 | 1039 |
| -26 |      | 4201 | 1049 |
| -25 | 4227 | 1059 |      |
| -1  | -24  | 4269 | 1071 |

|    |      |      |      |
|----|------|------|------|
|    | 49   | 3419 | 838  |
| 3  | 48   | 3441 | 846  |
|    | 47   | 3464 | 848  |
|    | 46   | 3488 | 850  |
|    | 45   | 3527 | 852  |
|    | 44   | 3557 | 855  |
|    | 43   | 3588 | 860  |
|    | 42   | 3611 | 870  |
|    | 41   | 3640 | 882  |
|    | 40   | 3667 | 891  |
|    | 39   | 3698 | 899  |
|    | 38   | 3718 | 903  |
|    | 37   | 3749 | 908  |
|    | 2    | 36   | 3786 |
| 35 |      | 3820 | 917  |
| 34 |      | 3858 | 922  |
| 33 |      | 3882 | 928  |
| 32 |      | 3908 | 939  |
| 31 |      | 3946 | 949  |
| 30 |      | 3975 | 958  |
| 29 |      | 4015 | 969  |
| 28 |      | 4042 | 983  |
| 27 |      | 4083 | 994  |
| 26 |      | 4116 | 1008 |
| 25 | 4153 | 1020 |      |
| 1  | 24   | 4175 | 1035 |

|    |      |      |      |
|----|------|------|------|
|    | -23  | 4332 | 1083 |
|    | -22  | 4362 | 1093 |
|    | -21  | 4402 | 1100 |
|    | -20  | 4452 | 1110 |
|    | -19  | 4497 | 1118 |
|    | -18  | 4581 | 1139 |
|    | -17  | 4642 | 1156 |
|    | -16  | 4691 | 1163 |
|    | -15  | 4724 | 1173 |
|    | -14  | 4762 | 1183 |
|    | -13  | 4809 | 1200 |
| 0  | -12  | 4857 | 1214 |
|    | -11  | 4864 | 1216 |
|    | -10  | 4864 | 1216 |
|    | -9   | 4864 | 1216 |
|    | -8   | 4864 | 1216 |
|    | -7   | 4864 | 1216 |
|    | -6   | 4864 | 1216 |
|    | -5   | 4864 | 1216 |
|    | -4   | 4864 | 1216 |
|    | -3   | 4864 | 1216 |
|    | -2   | 4864 | 1216 |
| -1 | 4864 | 1216 |      |

|   |      |      |      |
|---|------|------|------|
|   | 23   | 4204 | 1039 |
|   | 22   | 4234 | 1048 |
|   | 21   | 4261 | 1058 |
|   | 20   | 4291 | 1069 |
|   | 19   | 4329 | 1079 |
|   | 18   | 4356 | 1092 |
|   | 17   | 4382 | 1102 |
|   | 16   | 4415 | 1110 |
|   | 15   | 4448 | 1123 |
|   | 14   | 4468 | 1129 |
|   | 13   | 4504 | 1135 |
| 0 | 12   | 4528 | 1143 |
|   | 11   | 4559 | 1148 |
|   | 10   | 4600 | 1153 |
|   | 9    | 4627 | 1159 |
|   | 8    | 4650 | 1167 |
|   | 7    | 4675 | 1175 |
|   | 6    | 4700 | 1178 |
|   | 5    | 4732 | 1189 |
|   | 4    | 4761 | 1193 |
|   | 3    | 4788 | 1203 |
|   | 2    | 4810 | 1207 |
| 1 | 4839 | 1211 |      |

**Supplementary Table 3.** Median follow-up time intervals for the study population

| <b>Time interval</b>                                                                                       | <b>Control population</b> | <b>Tuberculosis population</b> |
|------------------------------------------------------------------------------------------------------------|---------------------------|--------------------------------|
| Median time (IQR) from date residency in British Columbia established to tuberculosis diagnosis date       | 7.7 years<br>(3.7, 13.7)  | 7.7 years<br>(3.6, 13.9)       |
| Median time (IQR) from tuberculosis diagnosis date to Medical Service Plan or study end (31-December-2019) | 7.8 years<br>(3.5, 13.8)  | 7.2 years<br>(3.0, 12.4)       |

**Supplementary Figure 3.** Results of the segmented regression analysis on out-patient physician encounters related to (a) diseases of the circulatory system, (b) mental disorders, (c) diseases of the genitourinary system, (d) infectious and parasitic disease, (e) injury and poisoning, (f) disease of the nervous system and sense, (g) endocrine, nutritional, and metabolic diseases, and immunity disorders, and (h) ill-defined conditions.

*Figure 3a. Circulatory-related physician encounters*

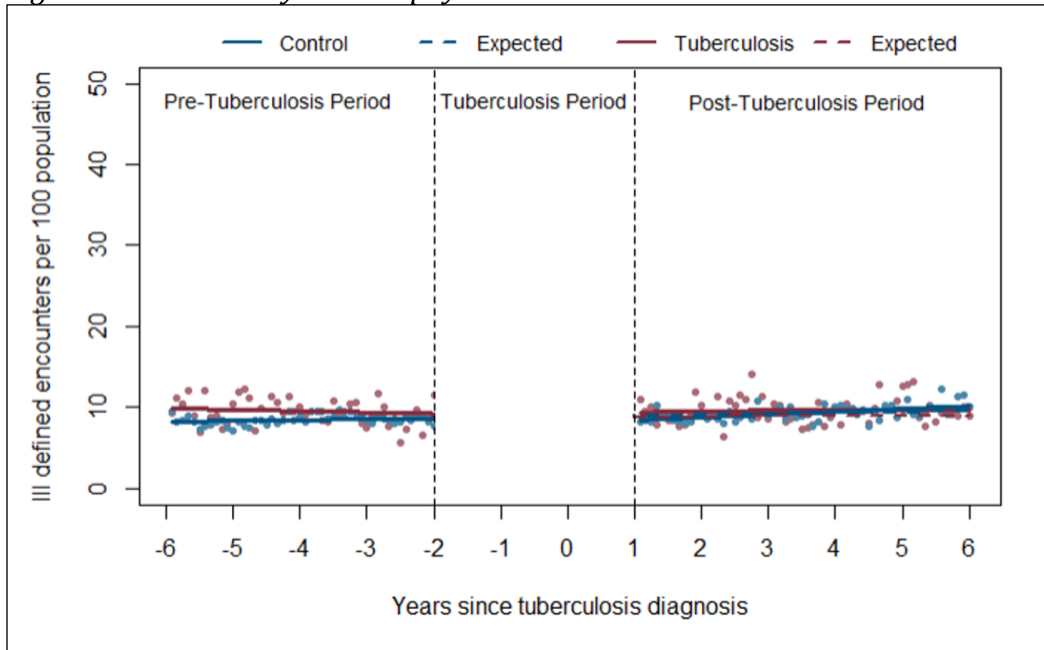

*Figure 3b. Mental disorder-related physician encounters*

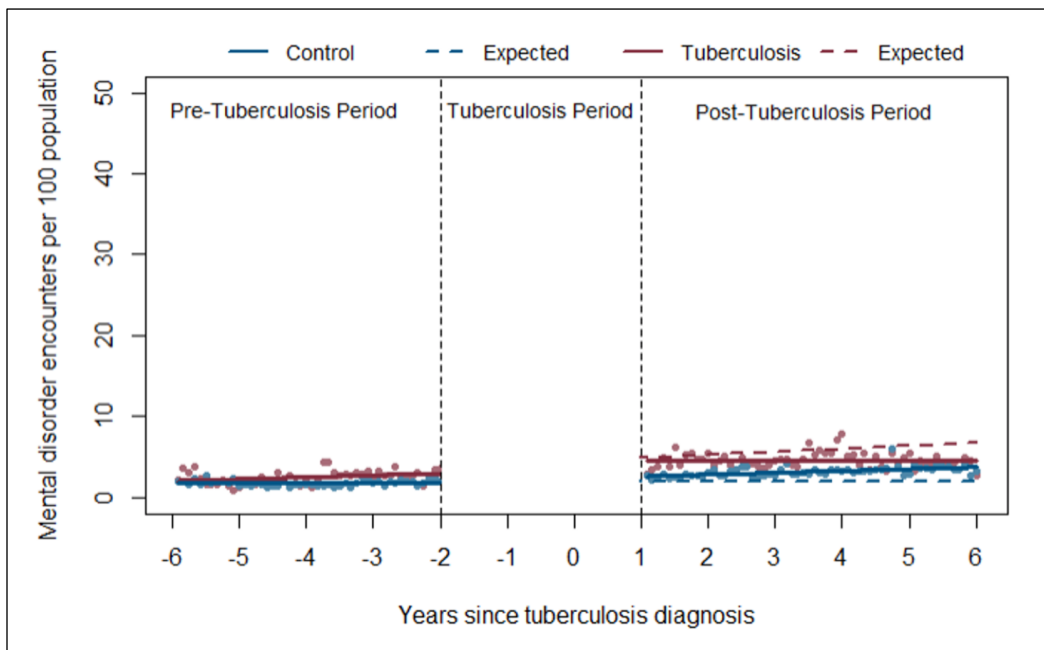



Figure 3c. Genitourinary-related physician encounters

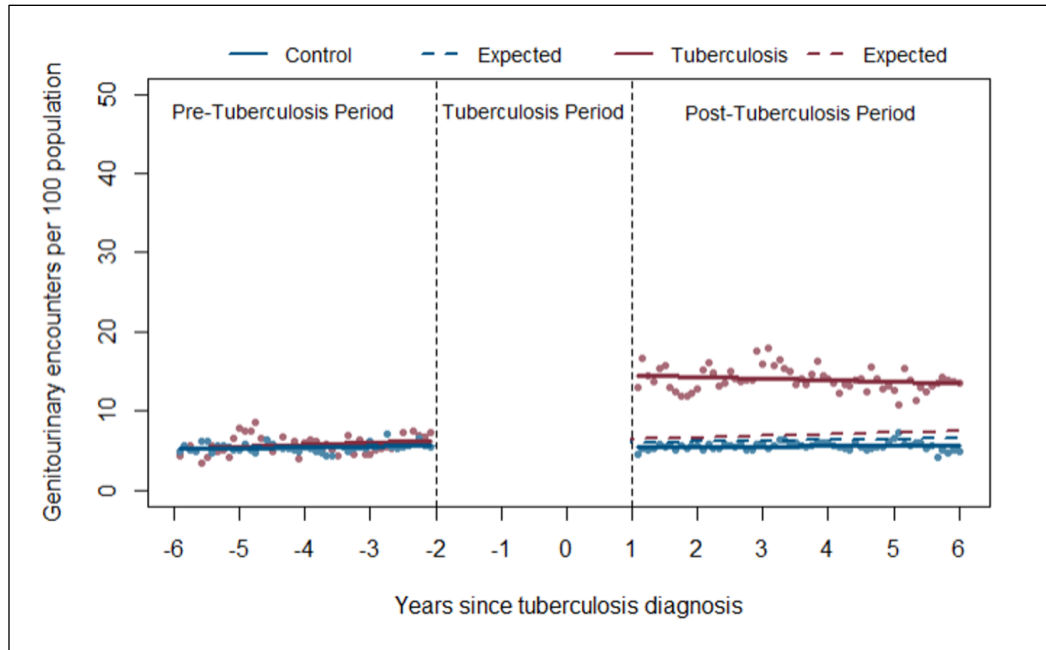

Figure 3d. Infectious and parasitic disease-related physician encounters

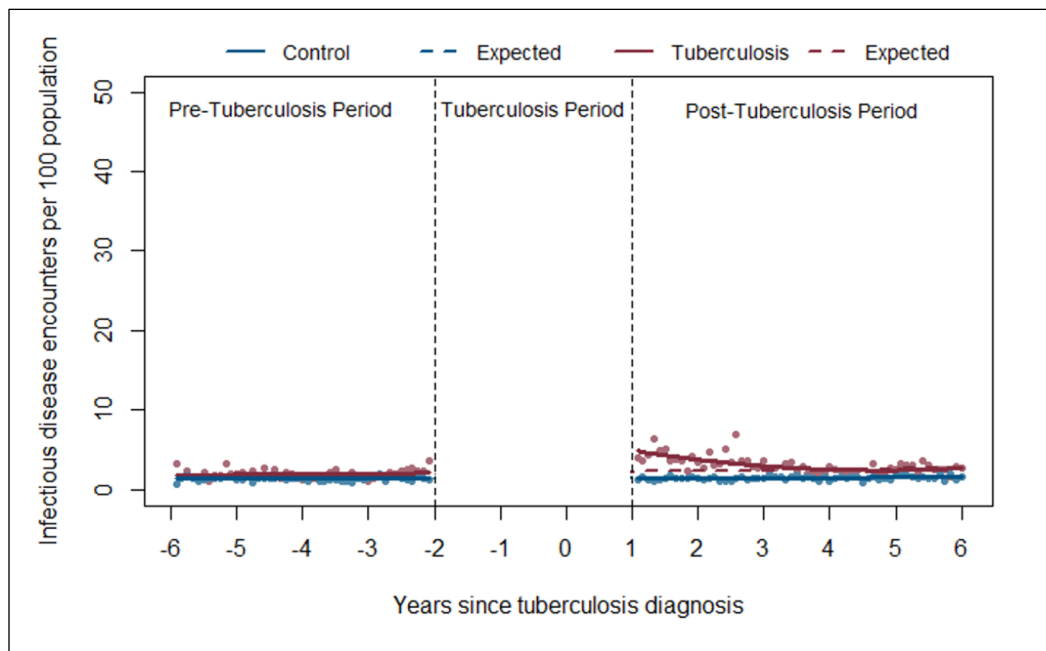

Figure 3e. Injury and poisoning-related physician encounters

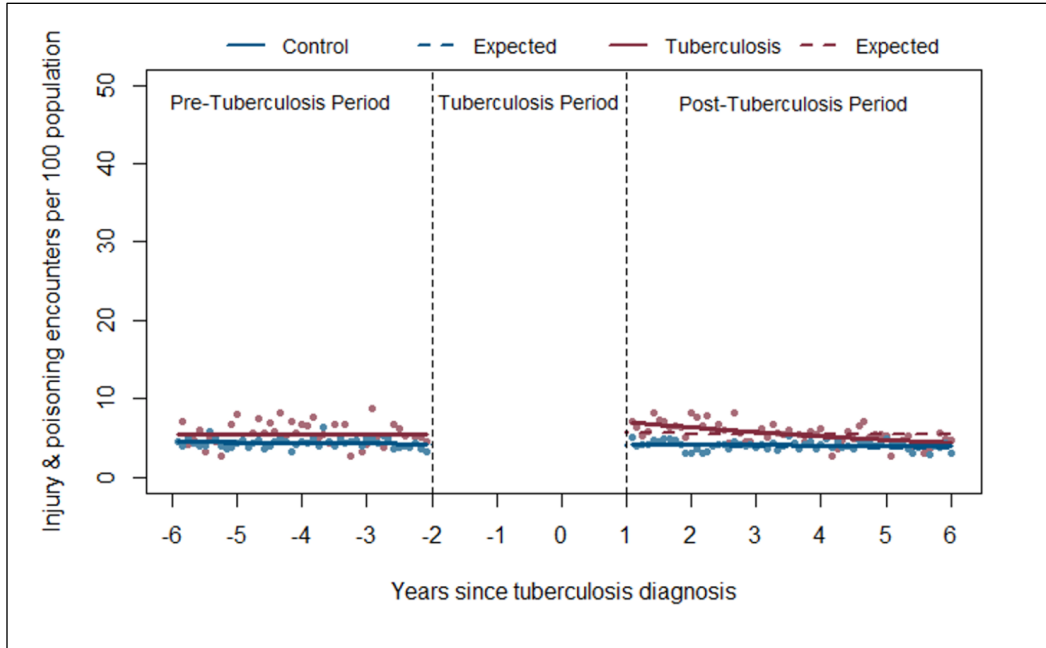

Figure 3f. Physician encounters related to endocrine, nutritional, and metabolic diseases, and immunity disorders

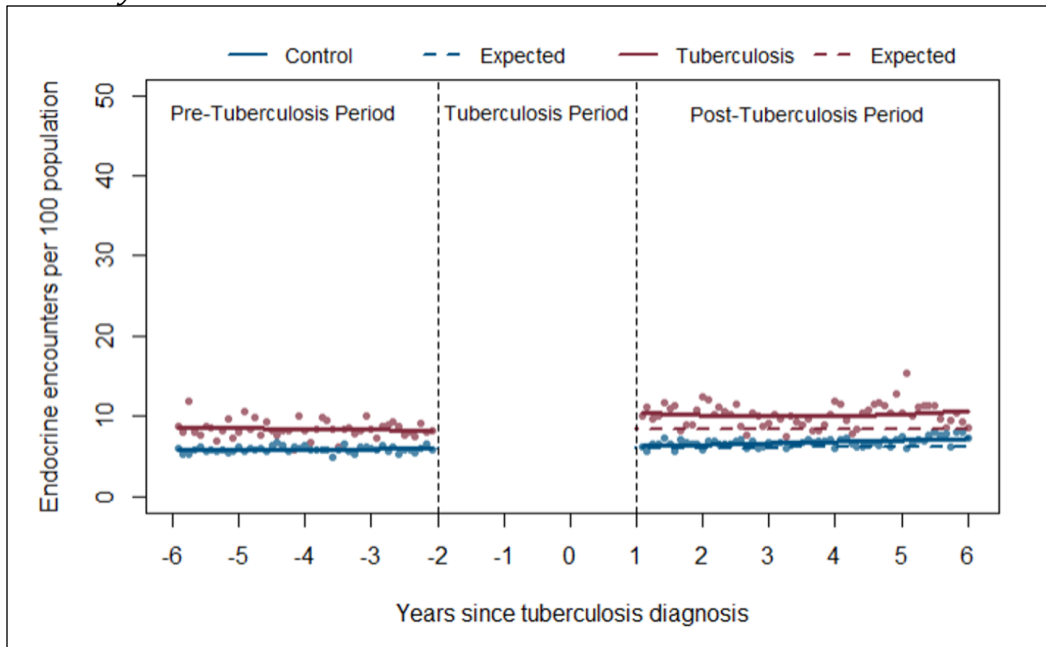

Figure 3g. Physician encounters related to ill-defined conditions

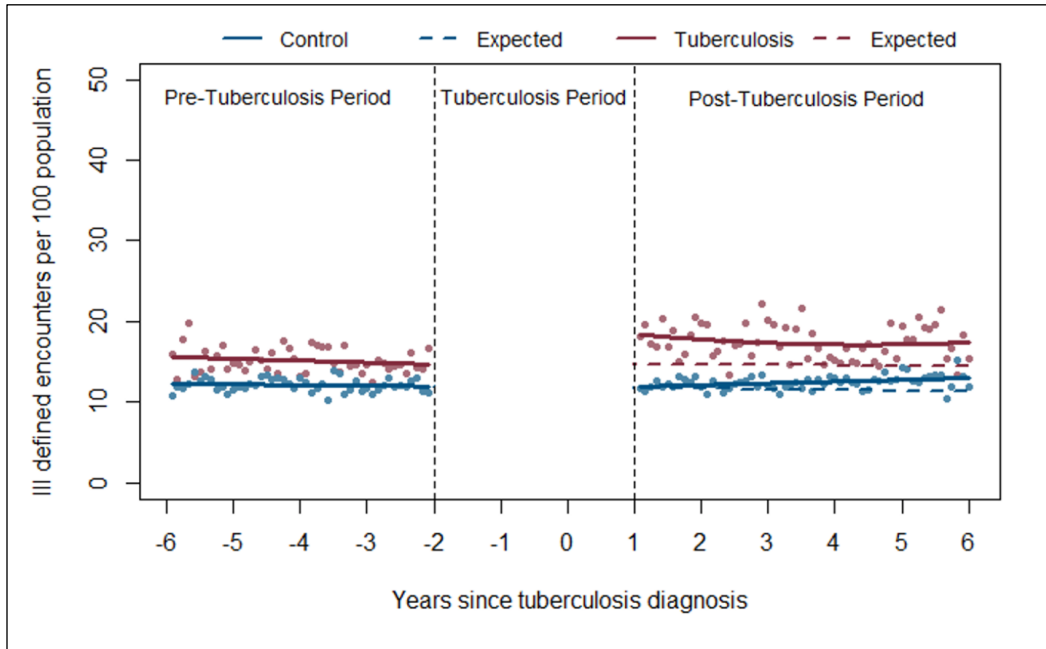

**Supplementary Table 4.** Changes in select outpatient physician encounters per 100 population at 1- and 5- years post-tuberculosis for people diagnosed with tuberculosis

| Physician encounter reason           | One year post tuberculosis |                                |                              |                          | Five years post tuberculosis |                                |                              |                          |
|--------------------------------------|----------------------------|--------------------------------|------------------------------|--------------------------|------------------------------|--------------------------------|------------------------------|--------------------------|
|                                      | Expected monthly rate      | Observed monthly rate (95% CI) | Absolute difference (95% CI) | Relative change (95% CI) | Expected monthly rate        | Observed monthly rate (95% CI) | Absolute difference (95% CI) | Relative change (95% CI) |
| Diseases of the circulatory system   | 9.8                        | 9.4 (8.6, 10.2)                | -0.4 (-1.2, 0.4)             | -4.2% (-12.4, 3.6)       | 9.2                          | 9.8 (9.2, 10.3)                | 0.6 (0.0, 1.1)               | 6.9% (0.0, 12.4)         |
| Mental disorder                      | 3.7                        | 4.6 (4.3, 5.0)                 | 0.9 (0.6, 1.3)               | 25.7% (17.5, 36.6)       | 5.6                          | 4.6 (4.3, 4.8)                 | -1 (-0.8, -1.3)              | -18.5% (-14.9, -23.8)    |
| Diseases of the genitourinary system | 5.7                        | 14.6 (14.1, 15.1)              | 8.9 (8.4, 9.4)               | 156.7% (147.9, 165.5)    | 6.1                          | 13.7 (13.4, 14.1)              | 7.6 (7.3, 8.0)               | 122.8% (117.9, 129.3)    |
| Infectious and parasitic diseases    | 2.0                        | 4.8 (4.4, 5.3)                 | 2.8 (2.4, 3.3)               | 138.7% (118.8, 163.6)    | 2.5                          | 2.4 (2.2, 2.6)                 | -0.1 (-0.3, 0.1)             | -3.2% (-11.3, 4.9)       |
| Injury and poisoning                 | 5.1                        | 7.0 (6.3, 7.7)                 | 1.9 (1.2, 2.6)               | 37.8% (24.0, 51.5)       | 5.5                          | 4.7 (4.4, 5.1)                 | -0.8 (-0.4, -1.1)            | -14.7% (-7.4, -20.1)     |

|                                                                        |      |                      |                   |                       |      |                      |                   |                       |
|------------------------------------------------------------------------|------|----------------------|-------------------|-----------------------|------|----------------------|-------------------|-----------------------|
| Endocrine, nutritional, and metabolic diseases, and immunity disorders | 8.4  | 10.5<br>(9.7, 11.2)  | 2.0<br>(1.2, 2.7) | 24.1%<br>(14.6, 32.3) | 8.8  | 10.3<br>(9.9, 10.7)  | 1.6<br>(1.1, 1.9) | 16.7%<br>(12.2, 21.2) |
| Symptoms, signs, and ill-defined conditions                            | 15.3 | 18.4<br>(17.3, 19.5) | 3.1<br>(2.0, 4.2) | 20.2%<br>(13.0, 27.4) | 15.8 | 17.2<br>(16.7, 17.7) | 1.4<br>(0.9, 1.9) | 8.6%<br>(5.4, 11.7)   |

**Supplementary Table 5.** Baseline characteristics of the coarsened exact matched tuberculosis and non-tuberculosis control populations

| <b>Characteristics</b>                                 | <b>Non-tuberculosis control population<br/>N (%)</b> | <b>Tuberculosis population<br/>N (%)</b> | <b>Standardized Mean Difference</b> |
|--------------------------------------------------------|------------------------------------------------------|------------------------------------------|-------------------------------------|
| <b>N</b>                                               | 1108                                                 | 1108                                     |                                     |
| <b>Medical Service Plan start year</b>                 |                                                      |                                          | <0.001                              |
| 1990 – 1995                                            | 414 (37.4)                                           | 414 (37.4)                               |                                     |
| 1996 – 2000                                            | 267 (24.1)                                           | 267 (24.1)                               |                                     |
| 2001 – 2005                                            | 166 (15.0)                                           | 166 (15.0)                               |                                     |
| 2006 – 2010                                            | 153 (13.8)                                           | 153 (13.8)                               |                                     |
| 2011 - 2015                                            | 89 (8.0)                                             | 89 (8.0)                                 |                                     |
| 2016 - 2019                                            | 19 (1.7)                                             | 19 (1.7)                                 |                                     |
| <b>Age at arrival to Canada, median (IOR)</b>          | 42.0 (29.0, 58.0)                                    | 43.0 (28.0, 58.0)                        | 0.022                               |
| <b>Sex</b>                                             |                                                      |                                          | <0.001                              |
| Male                                                   | 619 (55.9)                                           | 619 (55.9)                               |                                     |
| Female                                                 | 489 (44.1)                                           | 489 (44.1)                               |                                     |
| <b>WHO tuberculosis incidence in country of origin</b> |                                                      |                                          | <0.001                              |
| < 30 per 100,000                                       | 20 (1.8)                                             | 20 (1.8)                                 |                                     |
| 30 to 100 per 100,000                                  | 393 (35.5)                                           | 393 (35.5)                               |                                     |
| 101 to 200 per 100,000                                 | 363 (32.8)                                           | 363 (32.8)                               |                                     |
| > 200 per 100,000                                      | 332 (30.0)                                           | 332 (30.0)                               |                                     |
| <b>WHO region of origin</b>                            |                                                      |                                          | <0.001                              |
| Western Pacific Region                                 | 720 (65.0)                                           | 720 (65.0)                               |                                     |
| South-East Asia Region                                 | 298 (26.9)                                           | 298 (26.9)                               |                                     |
| Eastern Mediterranean Region                           | 29 (2.6)                                             | 29 (2.6)                                 |                                     |
| African Region                                         | 25 (2.3)                                             | 25 (2.3)                                 |                                     |
| European Region                                        | 23 (2.1)                                             | 23 (2.1)                                 |                                     |

|                                                   |                 |                 |        |
|---------------------------------------------------|-----------------|-----------------|--------|
| Region of the Americans                           | 13 (1.2)        | 13 (1.2)        |        |
| <b>Immigration class</b>                          |                 |                 | <0.001 |
| Family                                            | 587 (53.0)      | 587 (53.0)      |        |
| Economic                                          | 396 (35.7)      | 396 (35.7)      |        |
| Refugee                                           | 86 (7.8)        | 86 (7.8)        |        |
| Other                                             | 39 (3.5)        | 39 (3.5)        |        |
| <b>Elixhauser comorbidity score, median (IQR)</b> | 0.0 (0.0, 0.0)  | 0.0 (0.0, 0.0)  | <0.001 |
| <b>Neighbourhood income</b>                       |                 |                 | <0.001 |
| Lowest 20%                                        | 410 (37.0)      | 410 (37.0)      |        |
| Low-middle 20%                                    | 310 (28.0)      | 310 (28.0)      |        |
| Middle 20%                                        | 189 (17.1)      | 189 (17.1)      |        |
| Middle-high 20%                                   | 109 (9.8)       | 109 (9.8)       |        |
| Highest 20%                                       | 90 (8.1)        | 90 (8.1)        |        |
| <b>Health service delivery area</b>               |                 |                 | <0.001 |
| Metro                                             | 972 (87.7)      | 972 (87.7)      |        |
| Urban – Rural                                     | 124 (11.2)      | 124 (11.2)      |        |
| Rural - Remote                                    | 12 (1.1)        | 12 (1.1)        |        |
| <b>Years since arrival, median (IQR)</b>          | 7.0 (4.0, 14.0) | 7.0 (4.0, 14.0) | 0.004  |
| <b>Tuberculosis diagnosis year</b>                |                 |                 | <0.001 |
| 1990 - 1995                                       | 51 (4.6)        | 51 (4.6)        |        |
| 1996 – 2000                                       | 122 (11.0)      | 122 (11.0)      |        |
| 2001 – 2005                                       | 190 (17.1)      | 190 (17.1)      |        |
| 2006 – 2010                                       | 223 (20.1)      | 223 (20.1)      |        |
| 2011 – 2015                                       | 272 (24.5)      | 272 (24.5)      |        |
| 2016 – 2019                                       | 250 (22.6)      | 250 (22.6)      |        |

**Supplementary Figure 4.** Results of the segmented regression analysis for monthly rates of outpatient encounters, using coarsened exact matching rather than propensity score matching

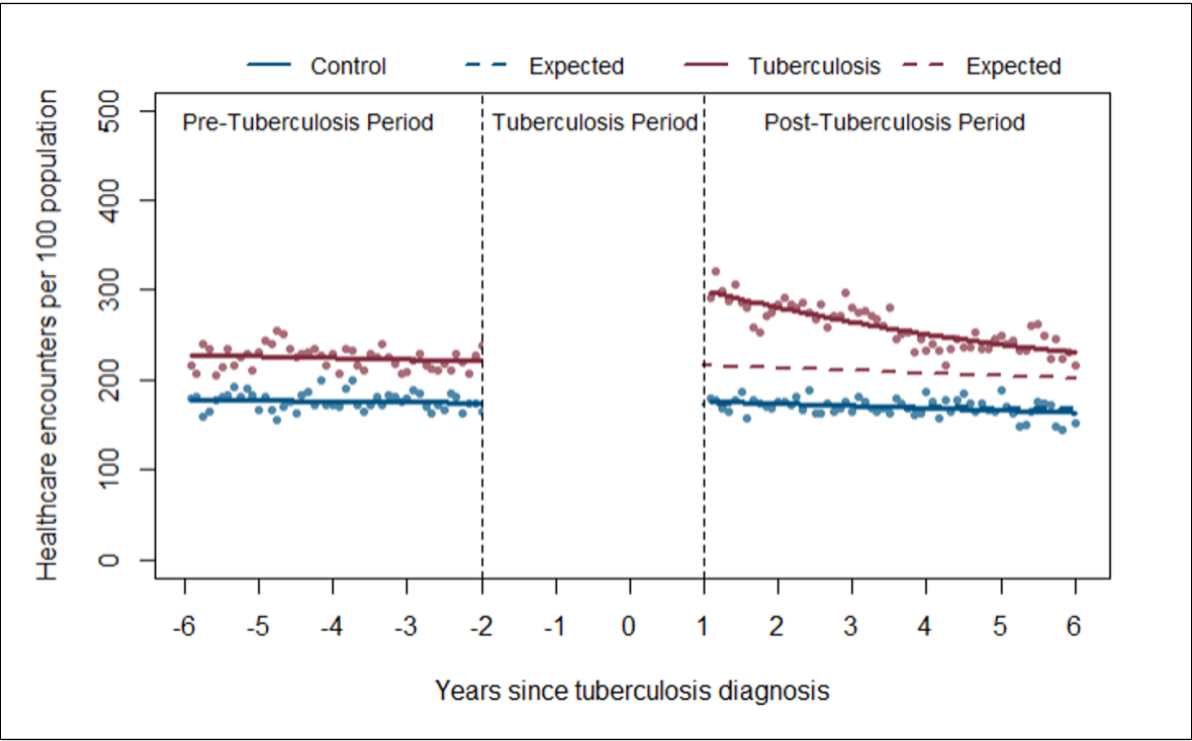



**Supplementary Figure 5.** Results of the segmented regression analysis for monthly rates of outpatient encounters, restricted to people treated for respiratory tuberculosis between 2000 and 2019

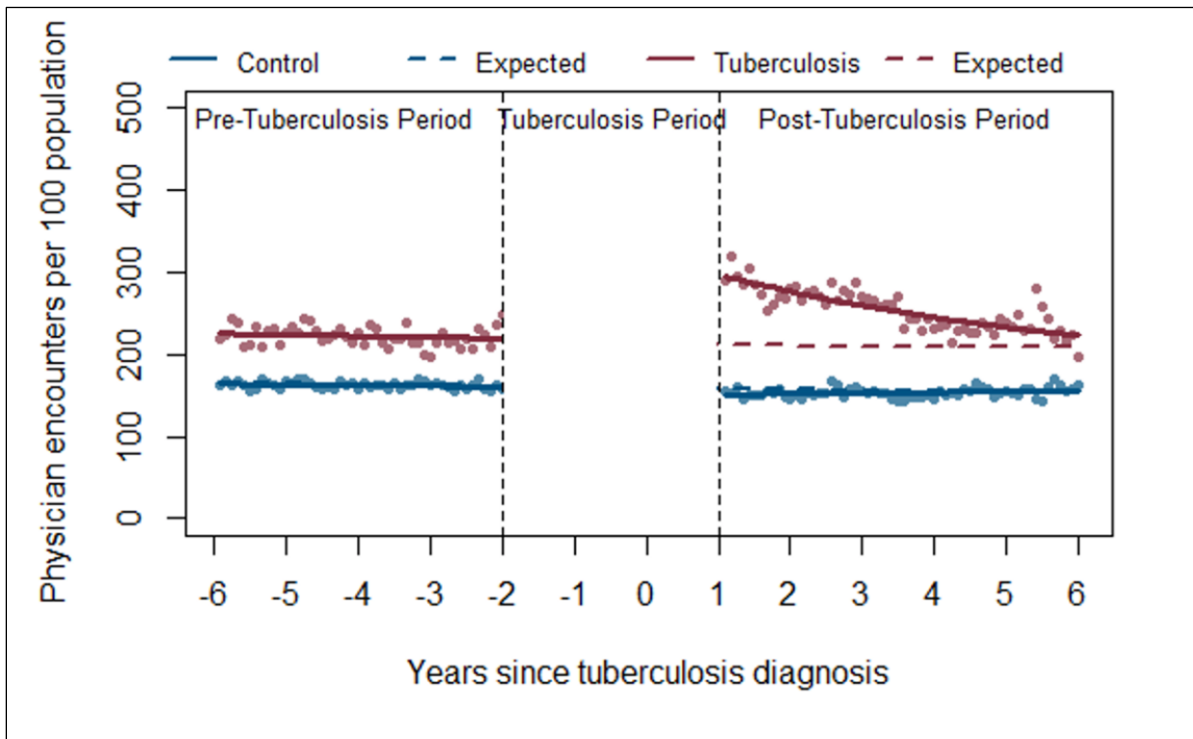

**The RECORD statement – checklist of items, extended from the STROBE statement, that should be reported in observational studies using routinely collected health data.**

|                           | <b>Item No.</b> | <b>STROBE items</b>                                                                                                                                                                        | <b>Location in manuscript where items are reported</b> | <b>RECORD items</b>                                                                                                                                                                                                                                                                                                                                                                                                                                | <b>Location in manuscript where items are reported</b> |
|---------------------------|-----------------|--------------------------------------------------------------------------------------------------------------------------------------------------------------------------------------------|--------------------------------------------------------|----------------------------------------------------------------------------------------------------------------------------------------------------------------------------------------------------------------------------------------------------------------------------------------------------------------------------------------------------------------------------------------------------------------------------------------------------|--------------------------------------------------------|
| <b>Title and abstract</b> |                 |                                                                                                                                                                                            |                                                        |                                                                                                                                                                                                                                                                                                                                                                                                                                                    |                                                        |
|                           | 1               | (a) Indicate the study’s design with a commonly used term in the title or the abstract (b) Provide in the abstract an informative and balanced summary of what was done and what was found | Abstract and title                                     | <p>RECORD 1.1: The type of data used should be specified in the title or abstract. When possible, the name of the databases used should be included.</p> <p>RECORD 1.2: If applicable, the geographic region and timeframe within which the study took place should be reported in the title or abstract.</p> <p>RECORD 1.3: If linkage between databases was conducted for the study, this should be clearly stated in the title or abstract.</p> | <p>Abstract</p> <p>Abstract</p> <p>Abstract</p>        |
| <b>Introduction</b>       |                 |                                                                                                                                                                                            |                                                        |                                                                                                                                                                                                                                                                                                                                                                                                                                                    |                                                        |
| Background rationale      | 2               | Explain the scientific background and rationale for the investigation being reported                                                                                                       | Pg. 4                                                  |                                                                                                                                                                                                                                                                                                                                                                                                                                                    |                                                        |
| Objectives                | 3               | State specific objectives, including any prespecified hypotheses                                                                                                                           | Pg. 4 - 5                                              |                                                                                                                                                                                                                                                                                                                                                                                                                                                    |                                                        |
| <b>Methods</b>            |                 |                                                                                                                                                                                            |                                                        |                                                                                                                                                                                                                                                                                                                                                                                                                                                    |                                                        |
| Study Design              | 4               | Present key elements of study design early in the paper                                                                                                                                    | Pg. 6                                                  |                                                                                                                                                                                                                                                                                                                                                                                                                                                    |                                                        |
| Setting                   | 5               | Describe the setting, locations, and relevant dates, including periods of recruitment, exposure, follow-up, and data collection                                                            | Pg. 4 - 6                                              |                                                                                                                                                                                                                                                                                                                                                                                                                                                    |                                                        |

|                              |   |                                                                                                                                                                                                                                                                                                                                                                                                                                                                                                                                                                                                                                                                                                                              |                               |                                                                                                                                                                                                                                                                                                                                                                                                                                                                                                                                                                                                                                                                                                      |                                                                                                               |
|------------------------------|---|------------------------------------------------------------------------------------------------------------------------------------------------------------------------------------------------------------------------------------------------------------------------------------------------------------------------------------------------------------------------------------------------------------------------------------------------------------------------------------------------------------------------------------------------------------------------------------------------------------------------------------------------------------------------------------------------------------------------------|-------------------------------|------------------------------------------------------------------------------------------------------------------------------------------------------------------------------------------------------------------------------------------------------------------------------------------------------------------------------------------------------------------------------------------------------------------------------------------------------------------------------------------------------------------------------------------------------------------------------------------------------------------------------------------------------------------------------------------------------|---------------------------------------------------------------------------------------------------------------|
| Participants                 | 6 | <p>(a) <i>Cohort study</i> - Give the eligibility criteria, and the sources and methods of selection of participants. Describe methods of follow-up</p> <p><i>Case-control study</i> - Give the eligibility criteria, and the sources and methods of case ascertainment and control selection. Give the rationale for the choice of cases and controls</p> <p><i>Cross-sectional study</i> - Give the eligibility criteria, and the sources and methods of selection of participants</p> <p>(b) <i>Cohort study</i> - For matched studies, give matching criteria and number of exposed and unexposed</p> <p><i>Case-control study</i> - For matched studies, give matching criteria and the number of controls per case</p> | <p>Pg. 6</p> <p>Pg. 6 - 7</p> | <p>RECORD 6.1: The methods of study population selection (such as codes or algorithms used to identify subjects) should be listed in detail. If this is not possible, an explanation should be provided.</p> <p>RECORD 6.2: Any validation studies of the codes or algorithms used to select the population should be referenced. If validation was conducted for this study and not published elsewhere, detailed methods and results should be provided.</p> <p>RECORD 6.3: If the study involved linkage of databases, consider use of a flow diagram or other graphical display to demonstrate the data linkage process, including the number of individuals with linked data at each stage.</p> | <p>Pg. 6</p> <p>NA - population selected from Provincial Registry</p> <p>Sup. figure 2 - study flow chart</p> |
| Variables                    | 7 | Clearly define all outcomes, exposures, predictors, potential confounders, and effect modifiers. Give diagnostic criteria, if applicable.                                                                                                                                                                                                                                                                                                                                                                                                                                                                                                                                                                                    | Pg. 7                         | RECORD 7.1: A complete list of codes and algorithms used to classify exposures, outcomes, confounders, and effect modifiers should be provided. If these cannot be reported, an explanation should be provided.                                                                                                                                                                                                                                                                                                                                                                                                                                                                                      | Pg. 6 - 7;<br>Sup. Table 1                                                                                    |
| Data sources/<br>measurement | 8 | For each variable of interest, give sources of data and details of methods of assessment (measurement). Describe comparability of assessment methods if there is more than one group                                                                                                                                                                                                                                                                                                                                                                                                                                                                                                                                         | Pg. 7 - 8                     |                                                                                                                                                                                                                                                                                                                                                                                                                                                                                                                                                                                                                                                                                                      |                                                                                                               |

|                                  |    |                                                                                                                                                                                                                                                                                                                                                                                                                                                                                                                                                                      |                                  |                                                                                                                                                       |                       |
|----------------------------------|----|----------------------------------------------------------------------------------------------------------------------------------------------------------------------------------------------------------------------------------------------------------------------------------------------------------------------------------------------------------------------------------------------------------------------------------------------------------------------------------------------------------------------------------------------------------------------|----------------------------------|-------------------------------------------------------------------------------------------------------------------------------------------------------|-----------------------|
| Bias                             | 9  | Describe any efforts to address potential sources of bias                                                                                                                                                                                                                                                                                                                                                                                                                                                                                                            | Pg. 7 - 8                        |                                                                                                                                                       |                       |
| Study size                       | 10 | Explain how the study size was arrived at                                                                                                                                                                                                                                                                                                                                                                                                                                                                                                                            | Sup. figure 2 - study flow chart |                                                                                                                                                       |                       |
| Quantitative variables           | 11 | Explain how quantitative variables were handled in the analyses. If applicable, describe which groupings were chosen, and why                                                                                                                                                                                                                                                                                                                                                                                                                                        | Pg. 6 - 8                        |                                                                                                                                                       |                       |
| Statistical methods              | 12 | (a) Describe all statistical methods, including those used to control for confounding<br>(b) Describe any methods used to examine subgroups and interactions<br>(c) Explain how missing data were addressed<br>(d) <i>Cohort study</i> - If applicable, explain how loss to follow-up was addressed<br><i>Case-control study</i> - If applicable, explain how matching of cases and controls was addressed<br><i>Cross-sectional study</i> - If applicable, describe analytical methods taking account of sampling strategy<br>(e) Describe any sensitivity analyses | Pg. 8 - 9                        |                                                                                                                                                       |                       |
| Data access and cleaning methods |    | ..                                                                                                                                                                                                                                                                                                                                                                                                                                                                                                                                                                   |                                  | RECORD 12.1: Authors should describe the extent to which the investigators had access to the database population used to create the study population. | Page 5; Contributions |

|                  |    |                                                                                                                                                                                                                                                                                                                                                 |                                                                |                                                                                                                                                                                                                                                                                                                    |                                         |
|------------------|----|-------------------------------------------------------------------------------------------------------------------------------------------------------------------------------------------------------------------------------------------------------------------------------------------------------------------------------------------------|----------------------------------------------------------------|--------------------------------------------------------------------------------------------------------------------------------------------------------------------------------------------------------------------------------------------------------------------------------------------------------------------|-----------------------------------------|
|                  |    |                                                                                                                                                                                                                                                                                                                                                 |                                                                | RECORD 12.2: Authors should provide information on the data cleaning methods used in the study.                                                                                                                                                                                                                    | Pg. 5                                   |
| Linkage          |    | ..                                                                                                                                                                                                                                                                                                                                              |                                                                | RECORD 12.3: State whether the study included person-level, institutional-level, or other data linkage across two or more databases. The methods of linkage and methods of linkage quality evaluation should be provided.                                                                                          | Pg. 5                                   |
| <b>Results</b>   |    |                                                                                                                                                                                                                                                                                                                                                 |                                                                |                                                                                                                                                                                                                                                                                                                    |                                         |
| Participants     | 13 | (a) Report the numbers of individuals at each stage of the study ( <i>e.g.</i> , numbers potentially eligible, examined for eligibility, confirmed eligible, included in the study, completing follow-up, and analysed)<br>(b) Give reasons for non-participation at each stage.<br>(c) Consider use of a flow diagram                          | Sup Figure 2 - study flow chart; pg. 10                        | RECORD 13.1: Describe in detail the selection of the persons included in the study ( <i>i.e.</i> , study population selection) including filtering based on data quality, data availability and linkage. The selection of included persons can be described in the text and/or by means of the study flow diagram. | Sup Figure 2 - study flow chart; pg. 10 |
| Descriptive data | 14 | (a) Give characteristics of study participants ( <i>e.g.</i> , demographic, clinical, social) and information on exposures and potential confounders<br>(b) Indicate the number of participants with missing data for each variable of interest<br>(c) <i>Cohort study</i> - summarise follow-up time ( <i>e.g.</i> , average and total amount) | Sup Figure 2 - study flow chart; Pg. 10; Table 1; Sup. Table 3 |                                                                                                                                                                                                                                                                                                                    |                                         |
| Outcome data     | 15 | <i>Cohort study</i> - Report numbers of outcome events or summary measures over time<br><i>Case-control study</i> - Report numbers in each exposure                                                                                                                                                                                             | Pg. 10 - 11; Table 2                                           |                                                                                                                                                                                                                                                                                                                    |                                         |

|                   |    |                                                                                                                                                                                                                                                                                                                                                                                                                 |                         |                                                                                                                                                                                                                                                                                                          |        |
|-------------------|----|-----------------------------------------------------------------------------------------------------------------------------------------------------------------------------------------------------------------------------------------------------------------------------------------------------------------------------------------------------------------------------------------------------------------|-------------------------|----------------------------------------------------------------------------------------------------------------------------------------------------------------------------------------------------------------------------------------------------------------------------------------------------------|--------|
|                   |    | category, or summary measures of exposure<br><i>Cross-sectional study</i> - Report numbers of outcome events or summary measures                                                                                                                                                                                                                                                                                |                         |                                                                                                                                                                                                                                                                                                          |        |
| Main results      | 16 | (a) Give unadjusted estimates and, if applicable, confounder-adjusted estimates and their precision (e.g., 95% confidence interval). Make clear which confounders were adjusted for and why they were included<br>(b) Report category boundaries when continuous variables were categorized<br>(c) If relevant, consider translating estimates of relative risk into absolute risk for a meaningful time period | Pg. 10 - 11;<br>Table 2 |                                                                                                                                                                                                                                                                                                          |        |
| Other analyses    | 17 | Report other analyses done— e.g., analyses of subgroups and interactions, and sensitivity analyses                                                                                                                                                                                                                                                                                                              | Pg. 11                  |                                                                                                                                                                                                                                                                                                          |        |
| <b>Discussion</b> |    |                                                                                                                                                                                                                                                                                                                                                                                                                 |                         |                                                                                                                                                                                                                                                                                                          |        |
| Key results       | 18 | Summarise key results with reference to study objectives                                                                                                                                                                                                                                                                                                                                                        | Pg. 11 - 12             |                                                                                                                                                                                                                                                                                                          |        |
| Limitations       | 19 | Discuss limitations of the study, taking into account sources of potential bias or imprecision. Discuss both direction and magnitude of any potential bias                                                                                                                                                                                                                                                      | Pg. 13                  | RECORD 19.1: Discuss the implications of using data that were not created or collected to answer the specific research question(s). Include discussion of misclassification bias, unmeasured confounding, missing data, and changing eligibility over time, as they pertain to the study being reported. | Pg. 13 |
| Interpretation    | 20 | Give a cautious overall interpretation of results considering objectives,                                                                                                                                                                                                                                                                                                                                       |                         |                                                                                                                                                                                                                                                                                                          |        |

|                                                           |    |                                                                                                                                                               |                   |                                                                                                                                                          |                             |
|-----------------------------------------------------------|----|---------------------------------------------------------------------------------------------------------------------------------------------------------------|-------------------|----------------------------------------------------------------------------------------------------------------------------------------------------------|-----------------------------|
|                                                           |    | limitations, multiplicity of analyses, results from similar studies, and other relevant evidence                                                              | Pg. 13 - 14       |                                                                                                                                                          |                             |
| Generalisability                                          | 21 | Discuss the generalisability (external validity) of the study results                                                                                         | Pg. 13            |                                                                                                                                                          |                             |
| <b>Other Information</b>                                  |    |                                                                                                                                                               |                   |                                                                                                                                                          |                             |
| Funding                                                   | 22 | Give the source of funding and the role of the funders for the present study and, if applicable, for the original study on which the present article is based | Funding statement |                                                                                                                                                          |                             |
| Accessibility of protocol, raw data, and programming code |    | ..                                                                                                                                                            |                   | RECORD 22.1: Authors should provide information on how to access any supplemental information such as the study protocol, raw data, or programming code. | Data availability statement |

\*Reference: Benchimol EI, Smeeth L, Guttman A, Harron K, Moher D, Petersen I, Sørensen HT, von Elm E, Langan SM, the RECORD Working Committee. The REporting of studies Conducted using Observational Routinely-collected health Data (RECORD) Statement. *PLoS Medicine* 2015; in press.

\*Checklist is protected under Creative Commons Attribution ([CC BY](https://creativecommons.org/licenses/by/4.0/)) license.
